# Supplementary material
Source: publisher site journal article supplement (https://www.dovepress.com/article/262623)
Supplement: Supplementary file 1 [file get_supplementary_file.php]

**Supplementary tables**

Table 1: The distribution of pN2 in the right upper lobe

|  | **T1a(N=56)** | **T1b(N=137)** | **T1c(N=89)** | **Total(N=282)** |
| --- | --- | --- | --- | --- |
| **N0N2** | **0** | **5(3.6%)** | **7(7.9%)** | **12(4.3%)** |
| 4 | 0 | 3(2.2%) | 7(7.9%) | 10(3.5%) |
| 2+3 | 0 | 1(0.7%) | 0 | 1(0.4%) |
| 2+4 | 0 | 1(0.7%) | 0 | 1(0.4%) |
| **N1N2** | **0** | **13(9.5%)** | **6(6.7%)** | **19(6.7%)** |
| 2 | 0 | 1(0.7%) | 0 | 1(0.4%) |
| 4 | 0 | 5(3.6%) | 2(2.2%) | 7(2.5%) |
| 2+4 | 0 | 3(2.2%) | 4(4.5%) | 7(2.5%) |
| 3+4 | 0 | 1(0.7%) | 0 | 1(0.4%) |
| 2+4+7 | 0 | 1(0.7%) | 0 | 1(0.4%) |
| 2+3+4+7 | 0 | 1(0.7%) | 0 | 1(0.4%) |
| 2+4+7+8 | 0 | 1(0.7%) | 0 | 1(0.4%) |
| **Total** | **0** | **18(13.1%)** | **13(14.6%)** | **31(11.0%)** |

T1a: ≤1 cm; T1b: >1 and ≤2 cm; T1c: >2 and ≤3 cm; N0N2: skip metastases, no N1, but N2 involved; N1N2: both N1 and N2 involved.

Table 2: The distribution of pN2 in the right middle lobe

|  | **T1a(N=19)** | **T1b(N=31)** | **T1c(N=17)** | **Total(N=67)** |
| --- | --- | --- | --- | --- |
| **N0N2** | **0** | **3(9.7%)** | **0** | **3(4.5%)** |
| 2 | 0 | 1(3.2%) | 0 | 1(1.5%) |
| 7 | 0 | 1(3.2%) | 0 | 1(1.5%) |
| 2+4 | 0 | 1(3.2%) | 0 | 1(1.5%) |
| **N1N2** | **0** | **1(3.2%)** | **3(17.6%)** | **4(6.0%)** |
| 2+7 | 0 | 1(3.2%) | 2(11.8%) | 3(4.5%) |
| 2+4+7 | 0 | 0(0.0%) | 1(5.9%) | 1(1.5%) |
| **Total** | **0** | **4(12.9%)** | **3(17.6%)** | **7(10.4%)** |

T1a: ≤1 cm; T1b: >1 and ≤2 cm; T1c: >2 and ≤3 cm; N0N2: skip metastases, no N1, but N2 involved; N1N2: both N1 and N2 involved.

Table 3: The distribution of pN2 in the right lower lobe

|  | **T1a(N=20)** | **T1b(N=66)** | **T1c(N=38)** | **Total(N=124)** |
| --- | --- | --- | --- | --- |
| **N0N2** | **0** | **4(6.1%)** | **2(5.3%)** | **6(4.8%)** |
| 7 | 0 | 2(3.0%) | 1(2.6%) | 3(2.4%) |
| 2+7 | 0 | 1(1.5%) | 0 | 1(0.8%) |
| 2+3+7 | 0 | 1(1.5%) | 0 | 1(0.8%) |
| 2+4+7 | 0 | 0 | 1(2.6%) | 1(0.8%) |
| **N1N2** | **0** | **6(9.1%)** | **11(28.9%)** | **17(13.7%)** |
| 7 | 0 | 2(3.0%) | 5(13.2%) | 7(5.6%) |
| 8 | 0 | 1(1.5%) | 0 | 1(0.8%) |
| 2+7 | 0 | 0 | 2(5.3%) | 2(1.6%) |
| 4+7 | 0 | 0 | 2(5.3%) | 2(1.6%) |
| 2+4+7 | 0 | 1(1.5%) | 1(2.6%) | 2(1.6%) |
| 4+7+8 | 0 | 1(1.5%) | 0 | 1(0.8%) |
| 4+7+9 | 0 | 1(1.5%) | 0 | 1(0.8%) |
| 3+4+7+9 | 0 | 0 | 1(2.6%) | 1(0.8%) |
| **Total** | **0** | **10(15.2%)** | **13(34.2%)** | **23(18.5%)** |

T1a: ≤1 cm; T1b: >1 and ≤2 cm; T1c: >2 and ≤3 cm; N0N2: skip metastases, no N1, but N2 involved; N1N2: both N1 and N2 involved.

Table 4: The distribution of pN2 in the left upper lobe

|  | **T1a(N=29)** | **T1b(N=85)** | **T1c(N=69)** | **Total(N=183)** |
| --- | --- | --- | --- | --- |
| **N0N2** | **0** | **5(5.9%)** | **2(2.9%)** | **7(3.8%)** |
| 5 | 0 | 4(4.7%) | 1(1.4%) | 5(2.7%) |
| 6 | 0 | 1(1.2%) | 0 | 1(0.5%) |
| 4+5 | 0 | 0 | 1(1.4%) | 1(0.5%) |
| **N1N2** | **0** | **7(8.2%)** | **9(13.0%)** | **16(8.7%)** |
| 2 | 0 | 1(1.2%) | 0 | 1(0.5%) |
| 4 | 0 | 0 | 1(1.4%) | 1(0.5%) |
| 5 | 0 | 1(1.2%) | 3(4.3%) | 4(2.2%) |
| 6 | 0 | 1(1.2%) | 1(1.4%) | 2(1.1%) |
| 7 | 0 | 0 | 2(2.9%) | 2(1.1%) |
| 3+6 | 0 | 1(1.2%) | 0 | 1(0.5%) |
| 3+5+6 | 0 | 1(1.2%) | 0 | 1(0.5%) |
| 5+6 | 0 | 1(1.2%) | 1(1.4%) | 2(1.1%) |
| 5+7 | 0 | 0 | 1(1.4%) | 1(0.5%) |
| 5+6+8 | 0 | 1(1.2%) | 0 | 1(0.5%) |
| **Total** | **0** | **12(14.1%)** | **11(15.9%)** | **23(12.6%)** |

T1a: ≤1 cm; T1b: >1 and ≤2 cm; T1c: >2 and ≤3 cm; N0N2: skip metastases, no N1, but N2 involved; N1N2: both N1 and N2 involved.

Table 5: The distribution of pN2 in the left lower lobe

|  | **T1a(N=25)** | **T1b(N=44)** | **T1c(N=34)** | **Total(N=103)** |
| --- | --- | --- | --- | --- |
| **N0N2** | **0** | **1(2.3%)** | **3(8.8%)** | **4(3.9%)** |
| 7 | 0 | 1(2.3%) | 2(5.9%) | 3(2.9%) |
| 8+9 | 0 | 0 | 1(2.9%) | 1(1.0%) |
| **N1N2** | **0** | **3(6.8%)** | **4(11.8%)** | **7(6.8%)** |
| 4 | 0 | 0 | 1(2.9%) | 1(1.0%) |
| 7 | 0 | 2(4.5%) | 0 | 2(1.9%) |
| 5+7 | 0 | 0 | 1(2.9%) | 1(1.0%) |
| 5+7+9 | 0 | 0 | 2(5.9%) | 2(1.9%) |
| 7+8+9 | 0 | 1(2.3%) | 0 | 1(1.0%) |
| **Total** | **0** | **4(9.1%)** | **7(20.6%)** | **11(10.7%)** |

T1a: ≤1 cm; T1b: >1 and ≤2 cm; T1c: >2 and ≤3 cm; N0N2: skip metastases, no N1, but N2 involved; N1N2: both N1 and N2 involved.
